# Supplementary material
Source: Springer Nature journal article supplement (https://www.springermedizin.de/resource/supplementary/12936_2009_951_MOESM4_ESM.pdf/9548612)
Supplement: MOESM4 [file 9548612]

A

Comparator better

AS&amp;AQ better

DP (n=463)  
AHR=0.30 (0.22-0.41)

AS+SP (n=1,005)  
AHR=0.60 (0.48-0.73)

AL (n=1,319)  
AHR=0.63 (0.54-0.72)

AQ+SP (n=1,257)  
AHR=0.99 (0.88-1.12)

AQ (n=621)  
AHR=1.81 (1.45-2.26)

CQ+SP (n=699)  
AHR=2.41 (2.14-2.73)

AS4 (n=252)  
AHR 3.31 (2.38-4.61)

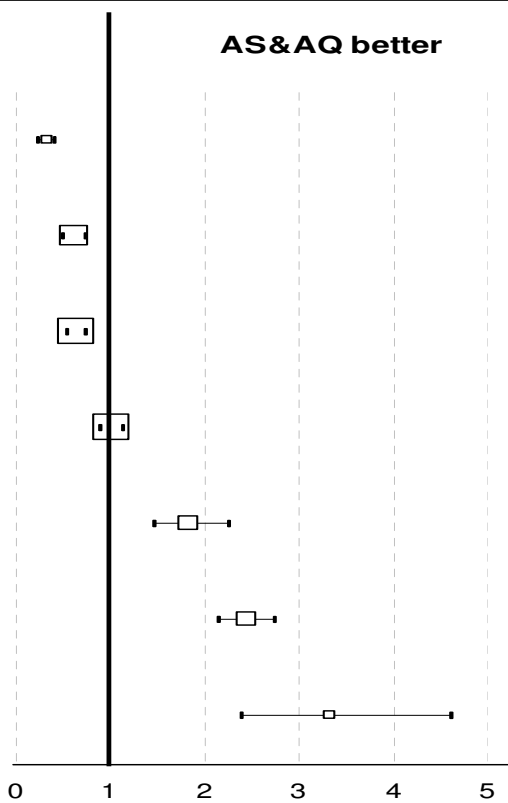

Adjusted Hazard ratio

B

Comparator better

AS&amp;AQ better

DP (n=463)  
AHR=0.48 (0.28-0.83)

AS+SP (n=1,005)  
AHR=0.61 (0.70-1.40)

AL (n=1,319)  
AHR=0.79 (0.57-1.10)

AQ+SP (n=1,257)  
AHR=1.98 (1.55-2.52)

AQ (n=621)  
AHR=3.02 (2.18-4.20)

CQ+SP (n=699)  
AHR=6.76 (5.23-8.75)

AS4 (n=252)  
AHR=8.67 (1.41-41.24)

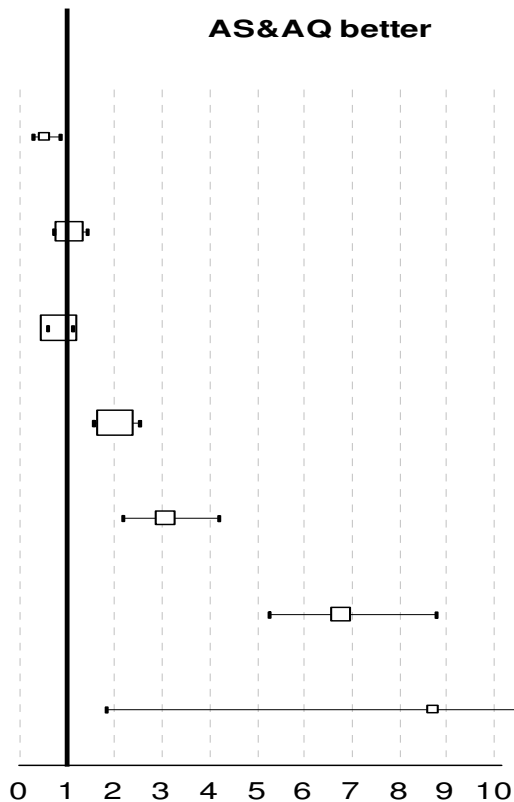

Adjusted Hazard ratio
